# Supplementary material for: Combined Assessment of Preoperative Frailty and Sarcopenia Allows the Prediction of Overall Survival in Patients with Lung Cancer (NSCLC) and Surgically Treated Brain Metastasis
Source: MDPI journal article supplement (doi:10.3390/cancers13133353), 2021-07-03
Supplement: s1 [file s1]

# Combined Assessment of Preoperative Frailty and Sarcopenia Allows the Prediction of Overall Survival in Patients with Lung Cancer (NSCLC) and Surgically Treated Brain Metastasis

Inja Ilic <sup>1,†,\*</sup>, Anton Faron, <sup>2,†</sup>, Muriel Heimann <sup>1</sup>, Anna-Laura Potthoff <sup>1</sup>, Niklas Schäfer <sup>3</sup>, Christian Bode <sup>4</sup>, Valeri Borger <sup>1</sup>, Lars Eichhorn <sup>4</sup>, Frank A. Giordano <sup>5</sup>, Erdem Güresir <sup>1</sup>, Andreas H. Jacobs <sup>6</sup>, Yon-Dschun Ko <sup>7</sup>, Jennifer Landsberg <sup>8</sup>, Felix Lehmann <sup>4</sup>, Alexander Radbruch <sup>9</sup>, Ulrich Herrlinger <sup>3</sup>, Hartmut Vatter <sup>1</sup>, Patrick Schuss, <sup>1,‡</sup> and Matthias Schneider <sup>1,‡</sup>

**Table S1.** Overview of the distribution of known molecular biomarkers in the present cohort of NSCLC patients\*.

|                 | Expression |         |         |
|-----------------|------------|---------|---------|
|                 | n.a.       | +       | –       |
| PD-L1           | 110 (78)   | 16 (11) | 15 (11) |
| EGFR-mutant     | 93 (66)    | 4 (3)   | 44 (31) |
| ALK-rearranged  | 92 (65)    | 1 (1)   | 48 (34) |
| ROS1-rearranged | 121 (86)   | 1 (1)   | 19 (13) |

\* **Values represent number of patients unless otherwise indicated (%)**. ALK, anaplastic lymphoma kinase; EGFR, epidermal growth factor receptor; n.a., not applicable; NSCLC, non-small cell lung carcinoma; PD-L1, anti-programmed cell death 1 ligand 1.
